# Supplementary material for: Rhizobacteria Impact Colonization of Listeria monocytogenes on Arabidopsis thaliana Roots
Source: PubMed Central journal article supplement (PMC8579980; doi:10.1128/aem.01411-21), 2021-11-10
Supplement: aem.01411-21-s0001.pdf [file aem.01411-21-s0001.pdf]

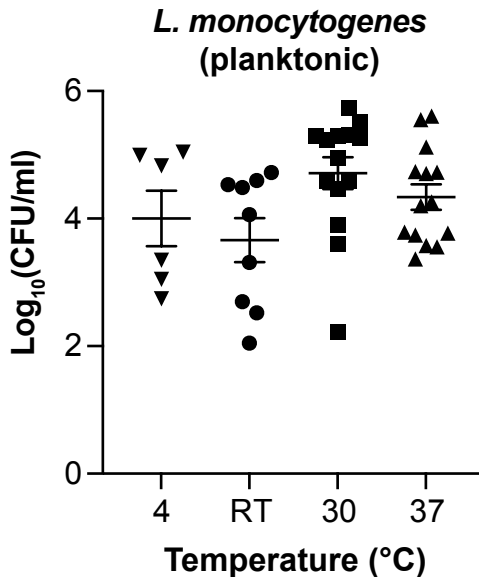

**Supplemental Figure 1. Pre-Inoculation growth temperature does not alter *L. monocytogenes* 10403S CFU/ml without seedlings present.** *L. monocytogenes* pre-grown at 4 °C, RT (20 – 22 °C), 30 °C, or 37 °C prior to inoculation were added to the hydroponic assay in 0.5X MS and incubated at RT for 24 h, after which CFU/ml liquid were determined. Kruskal-Wallis ANOVA and Mann-Whitney t-test were used for statistical comparisons. No significant differences were observed.

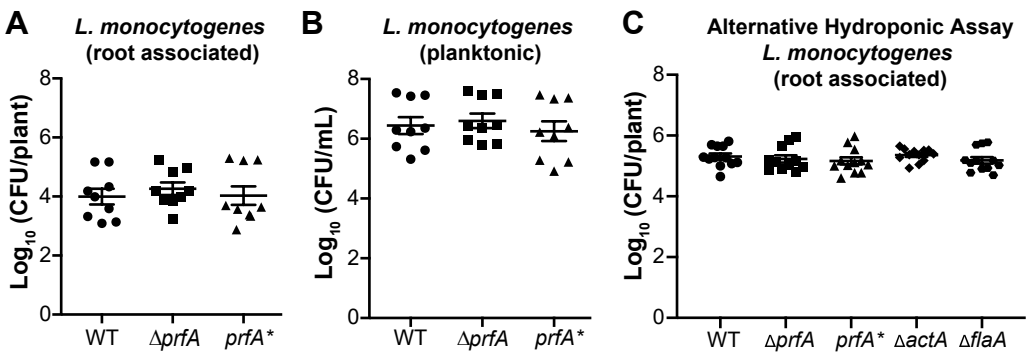

**Supplemental Figure 2. *L. monocytogenes* 10403S *prfA*, *prfA*\*, *flaA*, and *actA* mutants do not have altered root colonization compared to the 10403S parental strain.** (A, B) Using our conventional hydroponic assay, we compared root colonization of the parental 10403S to the *prfA* and *prfA*\* (constitutive) mutant strains. Samples were incubated at RT for 24 h before (A) CFU/plant and (B) CFU/ml liquid were determined from serial dilutions. (C) Using the modified hydroponic assay, we compared the CFU/plant of *L. monocytogenes* 10403S parental strain to the *prfA*, *prfA*\*, *flaA*, and *actA* mutants. After sonication, homogenate was serially diluted and plated on 1X LB to determine CFU/plant. Error bars represent standard error of the mean. Statistical comparisons were performed using Kruskal-Wallis ANOVA. There were no statistically significant differences observed in any panel.

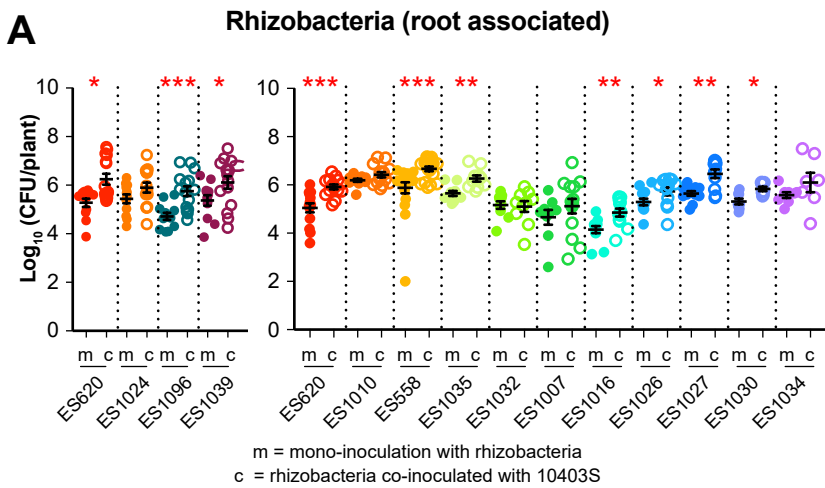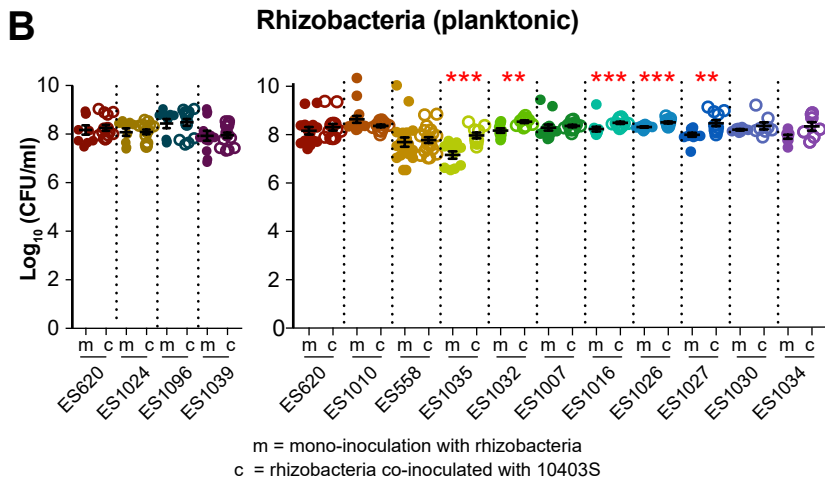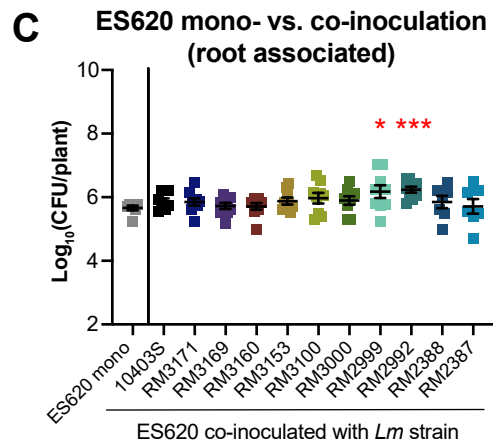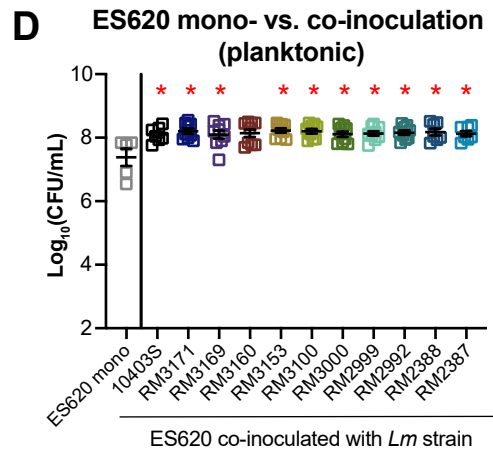

**Supplemental Figure 3. Co-inoculation with *L. monocytogenes* enhances the root colonization and planktonic survival of many rhizobacteria.** (A, B) *L. monocytogenes* 10403S was inoculated with multiple individual rhizobacteria by inoculating each bacterium at an OD<sub>600</sub> = 0.02 in a 1:1 ratio and incubating with seedling roots for 24 h at RT. After incubation, seedlings were removed from the wells, homogenized, and serial dilutions were plated on 1X LB to calculate the (A) CFU/plant and (B) CFU/ml liquid. The rhizobacteria tested were *Pseudomonas simiae* WCS417r (ES620), *Arthrobacter nicotinovorans* (ES1024), *Curtobacterium oceanosedimentum* (ES1096), *Microbacterium oleivorans* (ES1039), *Burkholderia cenocepacia* (ES1010), *Pseudomonas fluorescens* Pf-5 (ES558), *Pseudomonas brassicacearum* (ES1035), *Pseudomonas sp.* (ES1032), *Pseudomonas fluorescens* BZ64 (ES1007), *Pseudomonas umsongensis* (ES1016), *Pseudomonas sp.* (ES1026), *Pseudomonas mandelii* (ES1027), *Pseudomonas sp.* (ES1030), and *Pseudomonas sp.* KD5 (ES1034). Rhizobacterial colonies were distinguished from *L. monocytogenes* 10403S by color and morphology. “m” indicates data obtained from mono-inoculations and “c” indicates data obtained during co-inoculations. The separated graphs in A and B represent independent series of experiments. (C, D) *P. simiae* WCS417r (ES620) was co-inoculated with 11 different *L. monocytogenes* strains (10403S and ten RM strains; see strain table) as described for panels A, B and the (C) CFU/plant and (D) CFU/ml liquid were determined. *P. simiae* (ES620) colonies were distinguished from *L. monocytogenes* colonies by color and morphology. In all panels, each dot represents a biological replicate (single seedling), and data were obtained from at least three biological independent experiments. Error bars represent the standard error of the mean. Statistics were performed via Kruskal-Wallis ANOVA and Mann-Whitney t-tests comparing coculture to monoculture CFU. Asterisk denotes *P* value (\* = *P* < 0.05, \*\* = *P* < 0.01, \*\*\* = *P* < 0.001).

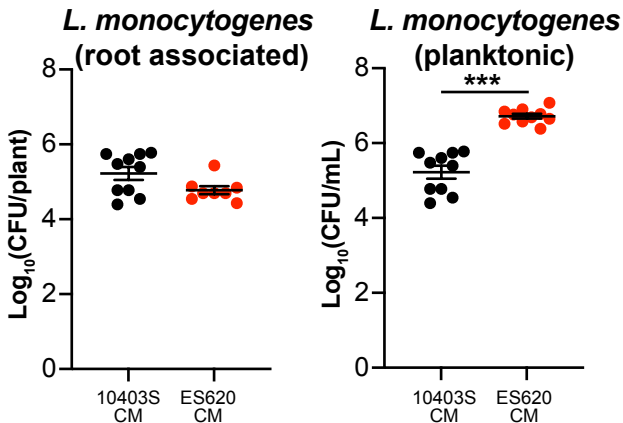

**Supplemental Figure 4. Ability of ES620 (*Pseudomonas simiae* WCS417r) to enhance 10403S root association is contact dependent.** Conditioned media (CM) was collected by centrifuging and filter sterilizing the liquid from bacteria grown with hydroponic plants after 24 h incubation at RT, then used fresh. CM from either *L. monocytogenes* strains (as a control) or ES620 were mixed at a 1:1 concentration with fresh media (0.5X MS:0.5X CM) in the assay. (A) *L. monocytogenes* CFU/plant and (B) CFU/ml were determined by serial dilutions on 1X LB. Statistics were performed using Mann-Whitney t-tests comparing the CFU/plant of *L. monocytogenes* grown in its own CM to *L. monocytogenes* grown in ES620 CM. Asterisks denote *P* value (\* = *P* < 0.05, \*\* = *P* < 0.01, \*\*\* = *P* < 0.001). Dashed lines indicate the level of detection.

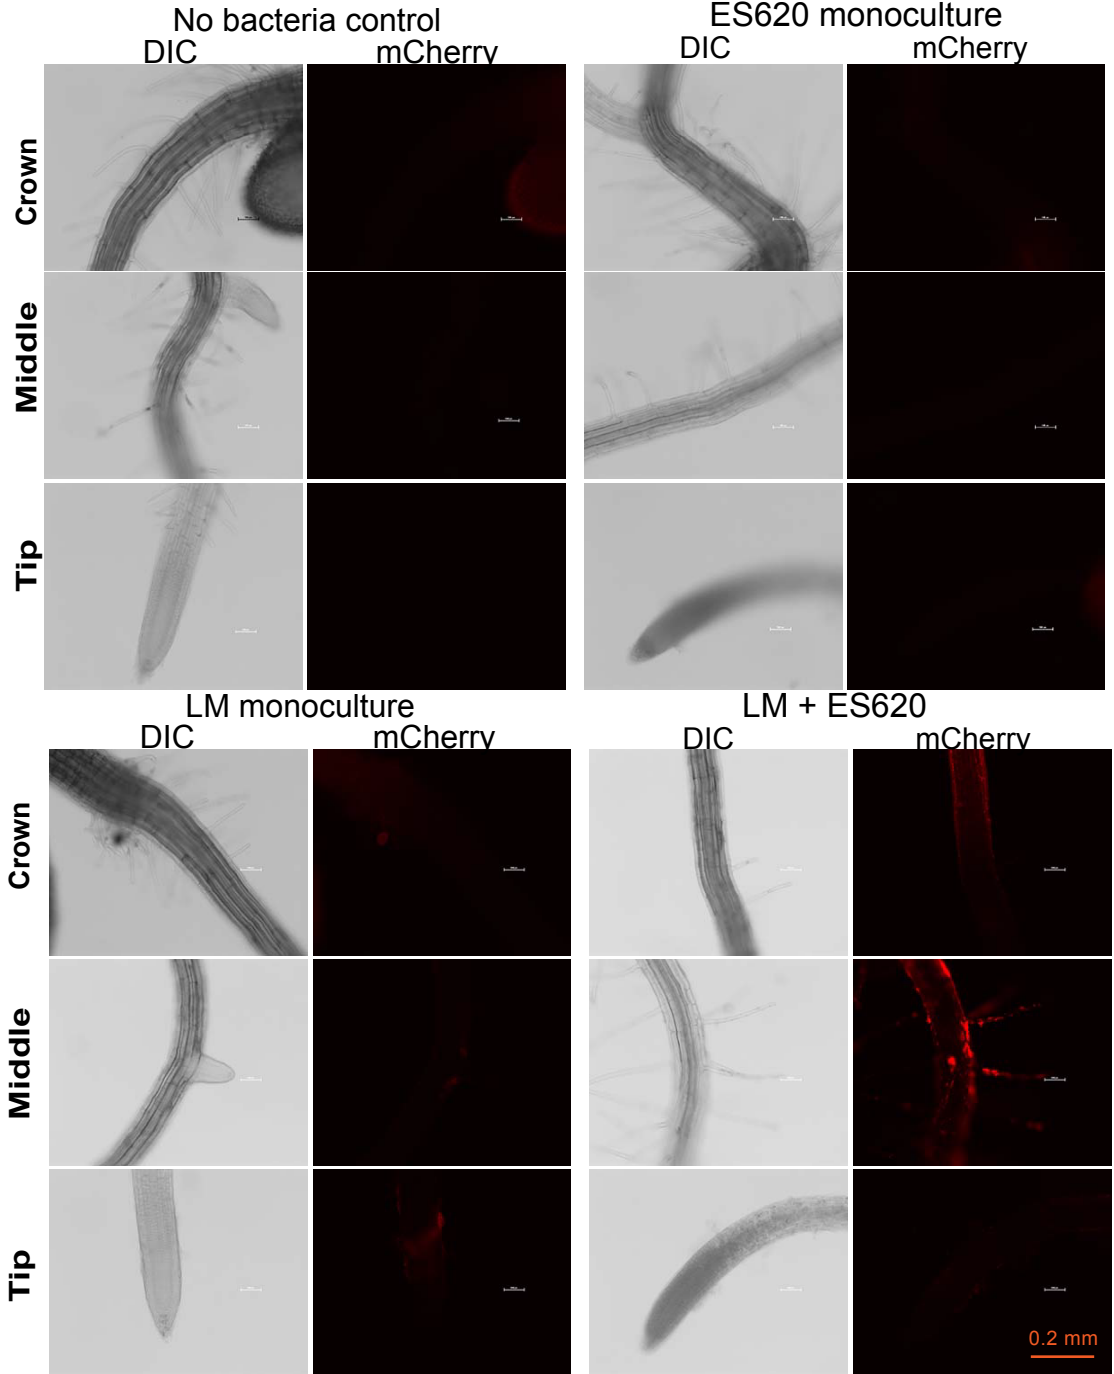

**Supplemental Figure 5. *Pseudomonas simiae* (ES620) enhances *L. monocytogenes* 10403S root colonization primarily at the crown and middle of the seedling.** Representative images of *A. thaliana* seedling roots either not inoculated with bacteria (top left), inoculated with ES620 (*P. simiae*) alone (top right), *L. monocytogenes* 10403S(pHPL3) alone (bottom left) or ES620 and 10403S(pHPL3) in coculture (bottom right). For each set of panels, brightfield images are on the left, and corresponding fluorescence images (false-colored red, representing mCherry) are on the right. Scale bar = 0.2 mm.

A

*L. monocytogenes* strains  
(root associated)

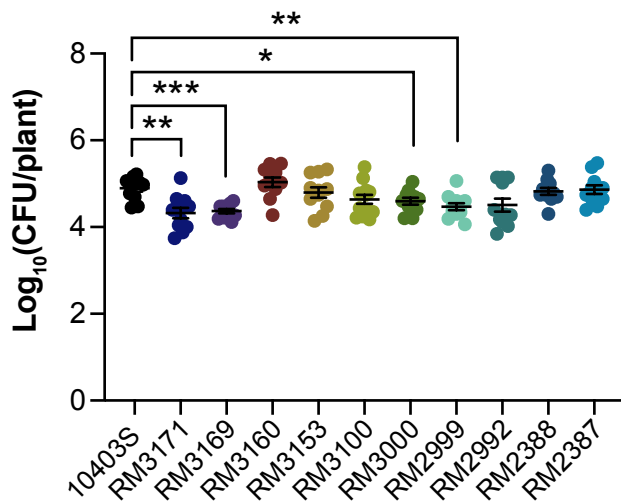

B

*L. monocytogenes* strains  
(planktonic)

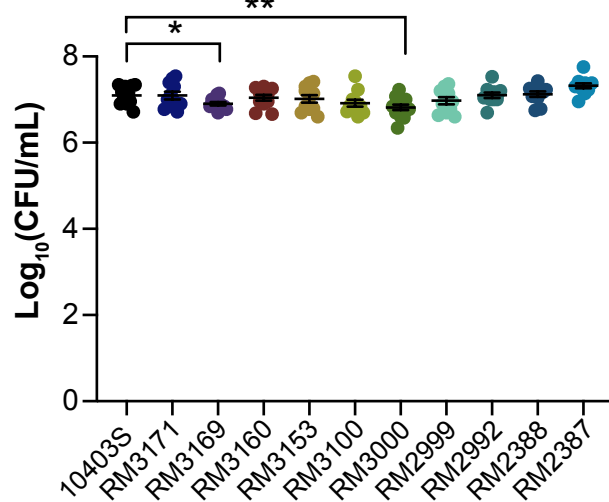

**Supplemental Figure 6. A wide range of *L. monocytogenes* strains can robustly colonize *A. thaliana* roots.** *L. monocytogenes* strains (10403S along with ten additional strains) were inoculated with in monoculture with *A. thaliana* seedlings for 24 h at RT. After incubation, seedlings were removed from the wells, homogenized, and serial dilutions plated on 1X LB to calculate the (A) CFU/plant and (B) CFU/ml liquid of each *L. monocytogenes* strain. Statistics were performed using Kruskal-Wallis ANOVA and Mann-Whitney t-tests comparing 10403S CFU levels to those of the other *L. monocytogenes* strains. Asterisks denote *P* value (\* = *P* < 0.05, \*\* = *P* < 0.01, \*\*\* = *P* < 0.001).

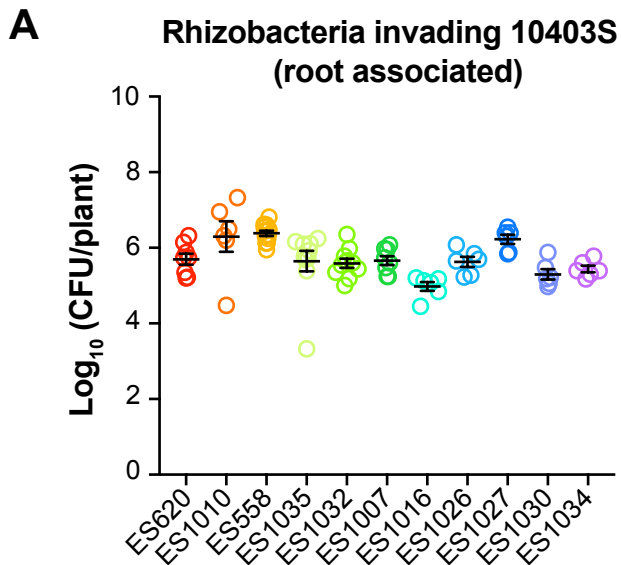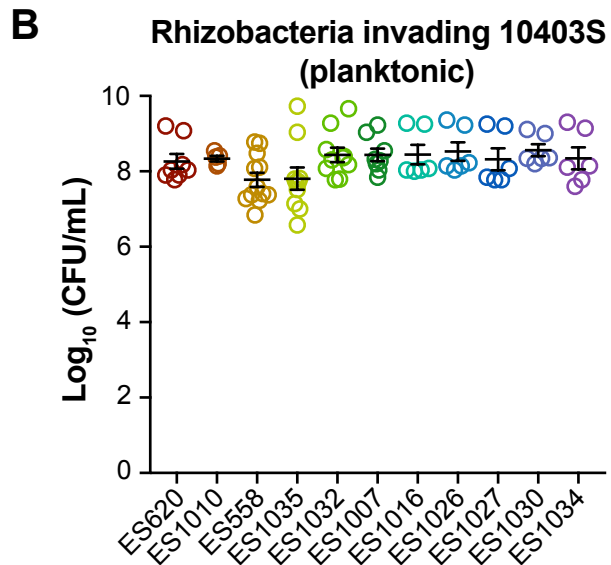

**Supplemental Figure 7. Rhizobacteria are able to invade and colonize *A. thaliana* roots pre-associated with *L. monocytogenes* 10403S.** In the invasion assay, *L. monocytogenes* 10403S was pre-loaded onto a seedling root (at  $\sim 10^5$  CFU/plant) then transferred to wells with a single rhizobacterium at an  $OD_{600} = 0.02$ . After 24 h at RT, seedlings were removed, sonicated, and serially diluted on 1X LB for rhizobacteria to determine (A) CFU/plant and (B) CFU/ml liquid.

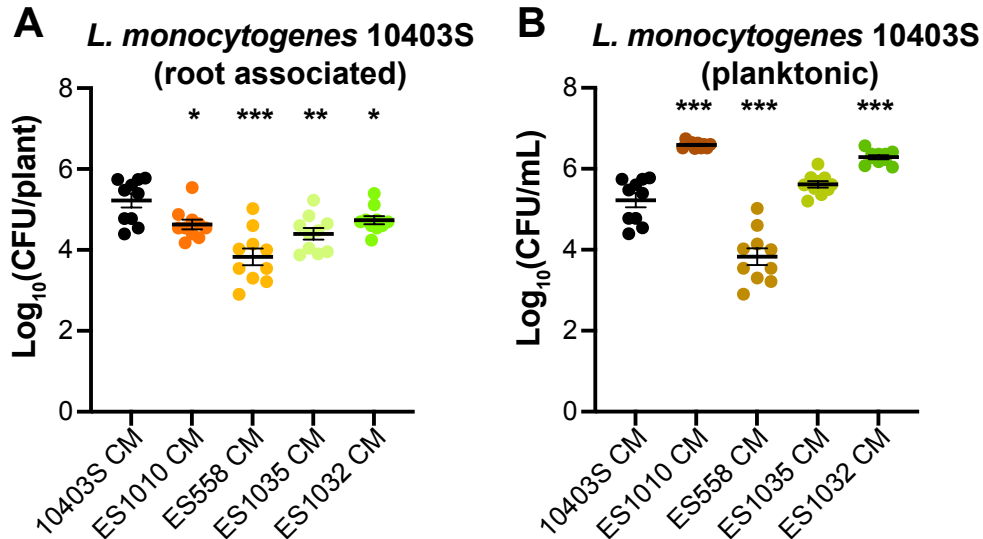

**Supplemental Figure 8. The antagonism of ES1010, ES558, ES1035 and ES1032 towards *L. monocytogenes* 10403S is mediated by secreted products.** Conditioned media (CM) was collected by centrifuging and filter sterilizing the liquid from bacteria grown with hydroponic plants after 24 h incubation at RT, then used fresh. CM from either *L. monocytogenes* 10403S (as a control) or rhizobacteria (*Burkholderia cenocepacia* (ES1010), *Pseudomonas fluorescens* Pf-5 (ES558), *Pseudomonas brassicacearum* (ES1035), *Pseudomonas sp.* (ES1032), were mixed at a 1:1 concentration with fresh MS (0.5X MS:0.5X CM) in the assay. (A) *L. monocytogenes* CFU/plant and (B) CFU/ml were determined by serially dilution on 1X LB. Statistics were performed using Mann-Whitney t-tests comparing CFU of *L. monocytogenes* grown in its own CM to *L. monocytogenes* grown in rhizobacteria CM. Asterisks denote *P* value (\* = *P* < 0.05 , \*\* = *P* < 0.01, \*\*\* = *P* < 0.001).



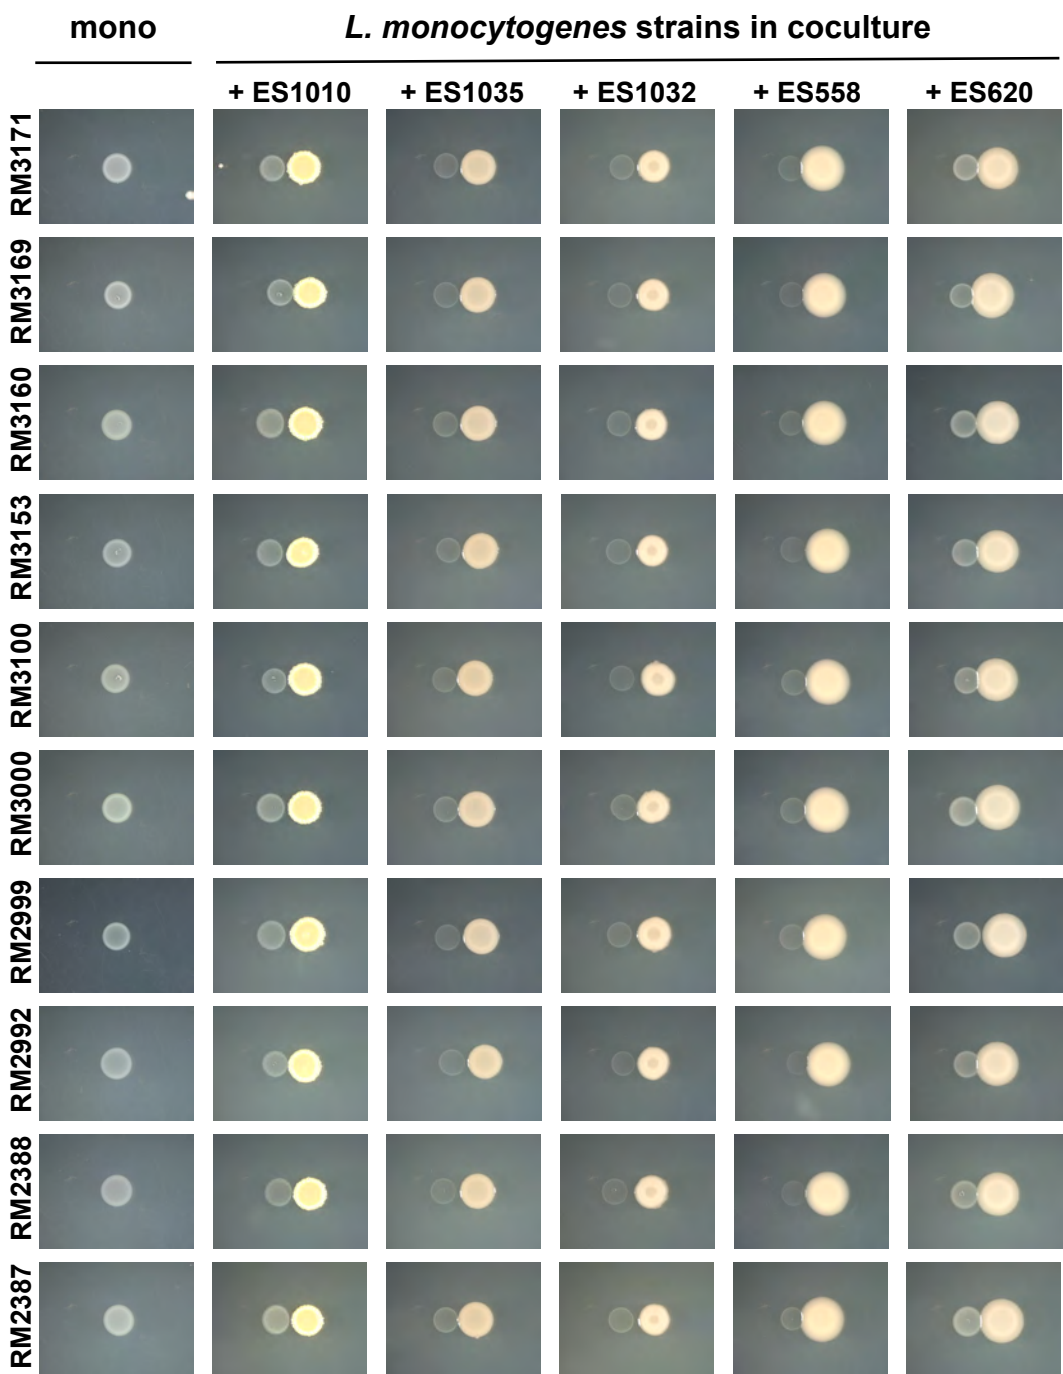

**Supplemental Figure 9. *L. monocytogenes* strains grown in agar coculture with five rhizobacteria.** *Burkholderia cenocepacia* (ES1010), *Pseudomonas brassicacearum* (ES1035), *Pseudomonas sp.* (ES1032), *Pseudomonas fluorescens* Pf-5 (ES558) and *Pseudomonas simiae* WCS417r (ES620) were cocultures with multiple *L. monocytogenes* (RM strains). Bacterial cells were scraped from plates of overnight growth, suspended in 1X LB to an  $OD_{600} = 0.5$  and 2  $\mu$ l of this bacterial suspension was pipetted onto 1X LB agar plates 0.5cm apart from the neighboring bacterial spot (based on center between spots). Plates were incubated at 30 °C for 48 h and then imaged. Antagonism was assessed by visually comparing the *L. monocytogenes* strains grown in monoculture to the colonies in coculture. A decrease in opacity (e.g., increase in transparency and translucency) was considered antagonism. Representative images are from a single experiment. Three independent experiments were performed with similar outcomes.

**Supplemental Table 1:** Interaction screening against *L. monocytogenes* 10403S

| ES ID  | Dangl ID | Genus                             | Antagonism in screen | Antagonism in follow up | Antagonism in hydroponic |
|--------|----------|-----------------------------------|----------------------|-------------------------|--------------------------|
| ES558  | NA       | <i>Pseudomonas protegens</i> Pf-5 | NA                   | XX                      | XXX                      |
| ES620  | NA       | <i>Pseudomonas WCS417r</i>        | NA                   | -                       | +                        |
| ES965  | CL002    | <i>Ochrobactrum</i>               | overgrown            | NA                      | NA                       |
| ES966  | CL004    | <i>Brevundimonas</i>              |                      | NA                      | NA                       |
| ES967  | CL010    | <i>Microbacterium</i>             |                      | NA                      | NA                       |
| ES968  | CL011    | <i>Burkholderia</i>               |                      | NA                      | NA                       |
| ES969  | CL012A   | <i>Microbacterium</i>             |                      | NA                      | NA                       |
| ES970  | CL013    | <i>Bacillus</i>                   |                      | NA                      | NA                       |
| ES971  | CL014    | <i>Variovorax</i>                 |                      | NA                      | NA                       |
| ES972  | CL017    | <i>Curtobacterium</i>             |                      | NA                      | NA                       |
| ES974  | CL019    | <i>Bosea</i>                      |                      | NA                      | NA                       |
| ES975  | CL020    | <i>Curtobacterium</i>             |                      | NA                      | NA                       |
| ES976  | CL021    | <i>Ralstonia</i>                  |                      | NA                      | NA                       |
| ES978  | CL028    | <i>Arthrobacter</i>               | X                    | NA                      | NA                       |
| ES979  | CL032    | <i>Agrobacterium</i>              |                      | NA                      | NA                       |
| ES980  | CL033    | <i>Phyllobacterium</i>            |                      | NA                      | NA                       |
| ES981  | CL041    | <i>Agrobacterium</i>              |                      | NA                      | NA                       |
| ES982  | CL045    | <i>Microbacterium</i>             |                      | NA                      | NA                       |
| ES983  | CL052    | <i>Paenibacillus</i>              | overgrown            | NA                      | NA                       |
| ES984  | CL058    | <i>Pseudomonas</i>                | X                    | NA                      | NA                       |
| ES985  | CL063    | <i>Arthrobacter</i>               |                      | NA                      | NA                       |
| ES986  | CL069    | <i>Acinetobacter</i>              |                      | NA                      | NA                       |
| ES987  | CL071    | <i>Acinetobacter</i>              |                      | NA                      | NA                       |
| ES988  | CL081    | <i>Bacillus</i>                   |                      | NA                      | NA                       |
| ES989  | CL089    | <i>Microbacterium</i>             |                      | NA                      | NA                       |
| ES991  | CL096    | <i>Bacillus</i>                   | overgrown            | NA                      | NA                       |
| ES992  | CL115    | <i>Bacillus</i>                   | overgrown            | NA                      | NA                       |
| ES994  | CL125    | <i>Methylobacterium</i>           |                      | NA                      | NA                       |
| ES995  | CL126    | <i>Methylobacterium</i>           |                      | NA                      | NA                       |
| ES996  | CL127    | <i>Microbacterium</i>             |                      | NA                      | NA                       |
| ES997  | CL129    | <i>Methylobacterium</i>           |                      | NA                      | NA                       |
| ES998  | CL130    | <i>Paenibacillus</i>              | XXX                  | NA                      | NA                       |
| ES999  | CL136    | <i>Methylobacterium</i>           |                      | NA                      | NA                       |
| ES1000 | CL140    | <i>Microbacterium</i>             |                      | NA                      | NA                       |
| ES1001 | CL141A   | <i>Paenibacillus</i>              | X                    | NA                      | NA                       |

|        |       |                         |           |     |     |
|--------|-------|-------------------------|-----------|-----|-----|
| ES1002 | CL143 | <i>Methylobacterium</i> |           | NA  | NA  |
| ES1003 | CL144 | <i>Ralstonia</i>        |           | NA  | NA  |
| ES1004 | CL152 | <i>Microbacterium</i>   |           | NA  | NA  |
| ES1005 | CL154 | <i>Leifsonia</i>        |           | NA  | NA  |
| ES1006 | MF002 | <i>Rhizobium</i>        | X         | NA  | NA  |
| ES1007 | MF003 | <i>Pseudomonas</i>      | overgrown | -   | X   |
| ES1008 | MF004 | <i>Variovorax</i>       |           | NA  | NA  |
| ES1009 | MF005 | <i>Bacillus</i>         | overgrown | NA  | NA  |
| ES1010 | MF006 | <i>Burkholderia</i>     | XX        | NA  | XXX |
| ES1011 | MF007 | <i>Burkholderia</i>     | XX        | NA  | NA  |
| ES1012 | MF008 | <i>Chryseobacterium</i> |           | NA  | NA  |
| ES1013 | MF009 | <i>Arthrobacter</i>     |           | NA  | NA  |
| ES1014 | MF010 | <i>Agrobacterium</i>    |           | NA  | NA  |
| ES1015 | MF011 | <i>Microbacterium</i>   |           | NA  | NA  |
| ES1016 | MF020 | <i>Pseudomonas</i>      |           | -   | X   |
| ES1017 | MF021 | <i>Leifsonia</i>        |           | NA  | NA  |
| ES1018 | MF022 | <i>Luteibacter</i>      |           | NA  | NA  |
| ES1019 | MF023 | <i>Rhodococcus</i>      |           | NA  | NA  |
| ES1020 | MF025 | <i>Ralstonia</i>        |           | NA  | NA  |
| ES1021 | MF026 | <i>Arthrobacter</i>     |           | NA  | NA  |
| ES1022 | MF027 | <i>Bacillus</i>         |           | NA  | NA  |
| ES1023 | MF029 | <i>Rhodococcus</i>      |           | NA  | NA  |
| ES1024 | MF031 | <i>Arthrobacter</i>     | X         | NA  | -   |
| ES1025 | MF033 | <i>Agrobacterium</i>    |           | NA  | NA  |
| ES1026 | MF035 | <i>Pseudomonas</i>      |           | X   | X   |
| ES1027 | MF036 | <i>Pseudomonas</i>      | XX        | XX  | X   |
| ES1028 | MF040 | <i>Flavobacterium</i>   |           | NA  | NA  |
| ES1030 | MF045 | <i>Pseudomonas</i>      |           | XX  | X   |
| ES1032 | MF048 | <i>Pseudomonas</i>      | XXX       | XXX | XXX |
| ES1033 | MF049 | <i>Arthrobacter</i>     |           | NA  | NA  |
| ES1034 | MF048 | <i>Pseudomonas</i>      |           | X   | X   |
| ES1035 | MF051 | <i>Pseudomonas</i>      | XXX       | XXX | XX  |
| ES1036 | MF057 | <i>Rhizobium</i>        |           | NA  | NA  |
| ES1039 | MF077 | <i>Microbacterium</i>   |           | NA  | -   |
| ES1040 | MF079 | <i>Dyella</i>           |           | NA  | NA  |
| ES1041 | MF088 | <i>Mycobacterium</i>    |           | NA  | NA  |
| ES1042 | MF092 | <i>Stenotrophomonas</i> |           | NA  | NA  |
| ES1043 | MF095 | <i>Bacillus</i>         | overgrown | NA  | NA  |

|        |        |                                                                |           |    |    |
|--------|--------|----------------------------------------------------------------|-----------|----|----|
| ES1044 | MF098A | <i>Leifsonia</i>                                               |           | NA | NA |
| ES1047 | MF106  | <i>Bacillus</i>                                                |           | NA | NA |
| ES1048 | MF109  | <i>Leifsonia</i>                                               |           | NA | NA |
| ES1049 | MF110  | <i>Variovorax</i>                                              |           | NA | NA |
| ES1050 | MF111  | <i>Methylobacterium</i>                                        |           | NA | NA |
| ES1051 | MF112  | <i>Bacillus</i>                                                | overgrown | NA | NA |
| ES1052 | MF113  | <i>Pseudomonas</i>                                             | X         | NA | NA |
| ES1053 | MF114  | <i>Rhodococcus</i>                                             |           | NA | NA |
| ES1055 | MF123  | <i>Bacillus</i>                                                |           | NA | NA |
| ES1058 | MF135  | <i>Arthrobacter</i>                                            |           | NA | NA |
| ES1062 | MF157  | <i>Leifsonia</i>                                               |           | NA | NA |
| ES1063 | MF160  | <i>Variovorax</i>                                              |           | NA | NA |
| ES1064 | MF161  | <i>Arthrobacter</i>                                            |           | NA | NA |
| ES1067 | MF166A | <i>Bacillus</i>                                                | overgrown | NA | NA |
| ES1070 | MF178  | <i>Dyella</i>                                                  |           | NA | NA |
| ES1071 | MF181  | <i>Paenibacillus</i>                                           | XXX       | NA | NA |
| ES1072 | MF190  | <i>Methylobacterium</i>                                        |           | NA | NA |
| ES1073 | MF196  | <i>Bacillus</i>                                                | overgrow  | NA | NA |
| ES1074 | MF212  | <i>Bacillus</i>                                                | overgrown | NA | NA |
| ES1075 | MF215  | <i>Bacillus</i>                                                |           | NA | NA |
| ES1076 | MF217  | <i>Paenibacillus</i>                                           | overgrown | NA | NA |
| ES1077 | MF220A | <i>Sphingomonas</i>                                            |           | NA | NA |
| ES1078 | MF224  | <i>Agrobacterium</i>                                           |           | NA | NA |
| ES1079 | MF231  | <i>Arthrobacter</i>                                            | X         | NA | NA |
| ES1080 | MF254  | <i>Arthrobacter</i>                                            |           | NA | NA |
| ES1081 | MF261  | <i>Microbacterium</i> (IMG wrongly says <i>Mycobacterium</i> ) |           | NA | NA |
| ES1082 | MF267  | <i>Mycobacterium</i>                                           |           | NA | NA |
| ES1083 | MF273  | <i>Terracoccus</i>                                             |           | NA | NA |
| ES1084 | MF275  | <i>Methylobacterium</i>                                        |           | NA | NA |
| ES1085 | MF278  | <i>Variovorax</i>                                              |           | NA | NA |
| ES1087 | MF283  | <i>Mycobacterium</i>                                           |           | NA | NA |
| ES1088 | MF285  | <i>Methylobacterium</i>                                        |           | NA | NA |
| ES1092 | MF300  | <i>Methylobacterium</i>                                        |           | NA | NA |
| ES1093 | MF302  | <i>Phyllobacterium</i>                                         |           | NA | NA |
| ES1095 | MF312A | <i>Chryseobacterium</i>                                        |           | NA | NA |
| ES1096 | MF314  | <i>Curtobacterium</i>                                          |           | NA | -  |
| ES1097 | MF322  | <i>Bacillus</i>                                                | overgrown | NA | NA |

|        |       |                          |     |    |    |
|--------|-------|--------------------------|-----|----|----|
| ES1098 | MF327 | <i>Promicromonospora</i> |     | NA | NA |
| ES1105 | MF349 | <i>Variovorax</i>        |     | NA | NA |
| ES1106 | MF350 | <i>Variovorax</i>        |     | NA | NA |
| ES1109 | MF360 | <i>Mycobacterium</i>     |     | NA | NA |
| ES1110 | MF362 | <i>Arthrobacter</i>      |     | NA | NA |
| ES1111 | MF363 | <i>Rhodococcus</i>       |     | NA | NA |
| ES1113 | MF366 | <i>Luteibacter</i>       |     | NA | NA |
| ES1114 | MF370 | <i>Ochrobactrum</i>      | X   | NA | NA |
| ES1115 | MF374 | <i>Brevundimonas</i>     |     | NA | NA |
| ES1116 | MF375 | <i>Variovorax</i>        |     | NA | NA |
| ES1117 | MF376 | <i>Burkholderia</i>      | X   | NA | NA |
| ES1118 | MF384 | <i>Burkholderia</i>      |     | NA | NA |
| ES1119 | MF395 | <i>Pseudomonas</i>       | XXX | NA | NA |
| ES1120 | MF397 | <i>Pseudomonas</i>       | XXX | NA | NA |
| ES1121 | MF467 | <i>Leifsonia</i>         |     | NA | NA |
| ES1123 | MF496 | <i>Paenibacillus</i>     |     | NA | NA |

**Supplemental Table 1:** ES ID pertains to the strain designation within the Shank Lab Strain Collection, while Dangl ID reflects the ID pertaining to Dangl Strain Collection and NCBI identification (1, 2). The level of antagonism is depicted by an X (minor), XX (moderate), XXX (high level), while a “-” indicates no antagonism was observed and “+” indicates better growth of *L. monocytogenes*. Overgrown indicates that the rhizobacteria overgrew the *L. monocytogenes* colony and it was impossible to determine whether antagonism was present. If an organism was not used in a given assay it is listed as NA.

## SUPPLEMENTAL REFERENCES

1. Lebeis SL, Paredes SH, Lundberg DS, Breakfield N, Gehring J, McDonald M, Malfatti S, Glavina del Rio T, Jones CD, Tringe SG, Dangl JL. 2015. Salicylic acid modulates colonization of the root microbiome by specific bacterial taxa. *Science* 349:860-864.
2. Lundberg DS LS, Paredes SH, Yourstone S, Gehring J, Malfatti S, Tremblay J, Engelbrektsen A, Kunin V, Del Rio TG, Edgar RC, Eickhorst T, Ley RE, Hugenholtz P, Tringe SG, Dangl JL. 2012. Defining the core *Arabidopsis thaliana* root microbiome. *Nature* 488:86-90.
